# Supplementary material for: An efficient solid phase synthesis of 5′-phosphodiester and phosphoramidate monoester nucleoside analogues
Source: Royal Society of Chemistry journal article supplement (doi:10.1039/b501043h), 2005-01-01
Supplement: b501043h.pdf [file b501043h.pdf]

# Supplementary Material (ESI) for Chemical Communications  
# This journal is © The Royal Society of Chemistry 2005

**An efficient Solid Phase Synthesis of  
5'-phosphodiester and phosphoramidate monoester nucleoside  
analogues**

**Lorenzo De Napoli, Giovanni Di Fabio,\* Jennifer D'Onofrio  
and Daniela Montesarchio**

*Dipartimento di Chimica Organica e Biochimica, Università degli Studi di Napoli "Federico II",  
Complesso Universitario di Monte S. Angelo, via Cynthia, I-80126 Napoli – Italy*

**ELECTRONIC SUPPLEMENTARY INFORMATION:**

**Experimental details**

## EXPERIMENTAL

**General Method.** NMR spectra were recorded in CDCl<sub>3</sub>, CD<sub>3</sub>OD or D<sub>2</sub>O with a Bruker WM 400 or an INOVA 500 Varian spectrometer. The chemical shifts ( $\delta$ ) are given in ppm with respect to the residual solvent signal (7.26, 3.31 and 4.80 ppm, respectively) and coupling constants (J) are in Hz.

<sup>31</sup>P NMR spectra were recorded at 161.98 MHz on a Bruker WM-400 spectrometer using 85% H<sub>3</sub>PO<sub>4</sub> as external standard.

For the ESI MS analysis a Waters Micromass ZQ instrument – equipped with an Electrospray source – was used in the negative mode.

HPLC analyses were performed on a Beckman System Gold 126 instrument equipped with a UV detector module 166 and a Shimadzu Chromatopac C-R6A integrator. The crude material was analyzed by HPLC on a Nucleosil 100-5 C18 column (4.6x250 mm, 5  $\mu$ m) eluted with a linear gradient of CH<sub>3</sub>CN in H<sub>2</sub>O, flow = 0.8 mL/min, detection at  $\lambda$  = 260 nm.

Tentagel<sup>®</sup>-NH<sub>2</sub> resin was purchased from Novabiochem. The functionalizations of the solid support were carried out in a short glass column (5 cm length, 1 cm i.d.), equipped with a sintered glass filter, a stopcock and a cap. The coupling reaction to obtain support **3** was performed using 5'-O-(2-cyanoethyl)-N,N-diisopropyl-phosphoramidite-3'-O-(4,4'-dimethoxytriphenylmethyl)-thymidine as building block. The nucleotide, the activator solution (0.45 M tetrazole in CH<sub>3</sub>CN) and the oxidizer solution (0.1 M iodine/THF/H<sub>2</sub>O/pyridine) were all purchased from Applied Biosystems.

Conventional abbreviations are used.

**Functionalization of the support and synthesis of 4** 500.0 mg of Tentagel<sup>®</sup>-NH<sub>2</sub> HL (0.41 meq/g, 0.20 mmol) were reacted, at r.t. overnight, with a mixture of 382.0 mg (2.0 mmol) of 3-chloro-4-hydroxy-phenylacetic acid, 317 μL (2.0 mmol) of DIC, 352 μL of DIEA and 313.6 mg (2.0 mmol) of N-hydroxybenzotriazole (HOBt·H<sub>2</sub>O) dissolved in 4 mL of anhydrous pyridine. After exhaustive washings with DCM, CH<sub>3</sub>OH and Et<sub>2</sub>O, the support was dried under reduced pressure. By Kaiser test, performed on weighed samples of the dried support, the incorporation of the linker was estimated almost quantitative. After capping of the unreacted amino functions with Ac<sub>2</sub>O/Py (1:1, v/v) for 1 h at r.t., the support was treated with conc. aq. ammonia (28%) at 50 °C for 1 h.

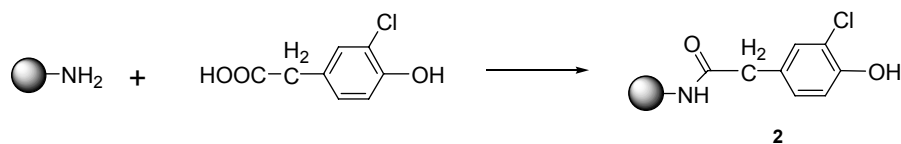

4.5 mL (2.03 mmol) of a commonly used ‘activator solution’ (0.45 M tetrazole in CH<sub>3</sub>CN) were added to 224 mg (0.31 mmol) of 5’-O-(2-cyanoethyl)-N,N-diisopropyl-phosphoramidite-3’-O-(4,4’-dimethoxytriphenylmethyl)-thymidine (**1**) and 500.0 mg (0.41 meq/g, 0.20 mmol) of support **2**. After 1 h the support was exhaustively washed with CH<sub>3</sub>CN and treated with 5 mL of a commonly used ‘oxidizer’ solution (I<sub>2</sub>/pyridine/H<sub>2</sub>O/THF) for 5 min. After exhaustive washings with CH<sub>3</sub>CN, DCM and Et<sub>2</sub>O, resulting support **3** was dried under reduced pressure. The complete oxidation of the phosphite triester to phosphate triester leading to support **3** was monitored by <sup>31</sup>P-NMR of the resin suspended in CDCl<sub>3</sub>. Typically, a relevant upfield shift of the signal at 135 ppm to two signals centered at *ca.* 4 ppm was observed. Incorporation yields of nucleotide **1** onto **2** were always in the range 70-80% (0.28-0.32 meq/g), as determined by quantitative DMT test performed on dried and weighed samples of support **3**.

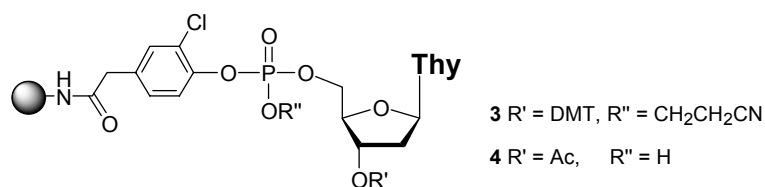

DMT removal was achieved by treatment with 1% DCA in DCM solution. After standard capping procedure with Ac<sub>2</sub>O/pyridine 1:1 (v/v), the phosphate deprotection from 2-cyanoethyl group was then carried out by treatment with Et<sub>3</sub>N/pyridine solution (1:1, v/v) for 1 h at 50 °C,

giving support **4**. The total deprotection was confirmed by a characteristic upfield shift in the signal of the  $^{31}\text{P}$  NMR spectrum of the solid support suspended in  $\text{CDCl}_3$ , from *ca.*  $\delta = 4$  ppm to  $\delta = -3$  ppm.

## A general procedure for the solid phase synthesis of 5'-phosphodiester and 5'-phosphoramidate monoester nucleosides

### A general procedure for the preparation of phosphodiesters 5 – 8

30 mg (0.28 meq/g, 0.0084 mmol) of dried support **4** were washed and swelled in anhydrous pyridine and then reacted with a mixture of 0.084 mmol of the chosen alcohol (see Table) and 25 mg (0.084 mmol) of 1-mesitylenesulfonyl-3-nitro-1,2,4-triazole (MSNT) in 300  $\mu$ L of anhydrous pyridine for 12 h at r. t. After exhaustive washings with pyridine, CH<sub>3</sub>OH, DCM and Et<sub>2</sub>O, the target analogues were detached from the support by conc. aq. ammonia treatment at 50 °C for 5 h.

### A general procedure for the preparation of phosphoramidate monoester 9 – 12

30 mg (0.28 meq/g, 0.0084 mmol) of dried support **4** were washed and swelled in anhydrous pyridine. The support was then treated with 1 mL of *p*-tosyl chloride solution (0.2 M *p*-TsCl, 0.4 M N-methyl imidazole in pyridine) for 15 min to r. t. to generate the active ester, followed by addition of 1 mL of the amine solution (0.45 M in pyridine), with appropriate washing steps in between.<sup>1</sup> After exhaustive washings with pyridine, CH<sub>3</sub>OH, DCM and Et<sub>2</sub>O, the target analogues were detached from the support by conc. aq. ammonia treatment at 50 °C for 5 h.

**Table 1.** Alcohols and amines used for the synthesis of phosphodiester and phosphoramidate nucleoside analogues 5- 12

|                   | 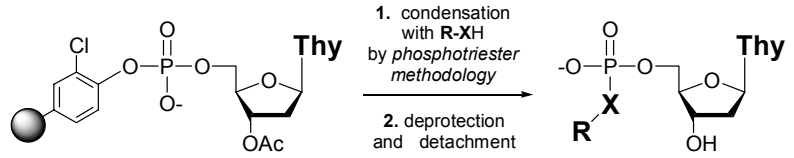 |                                                                                     |                                                                                      |                                                                                       |
|-------------------|--------------------------------------------------------------------------------------|-------------------------------------------------------------------------------------|--------------------------------------------------------------------------------------|---------------------------------------------------------------------------------------|
|                   | <b>X = O, NH</b>                                                                     |                                                                                     |                                                                                      |                                                                                       |
| R-OH              |   |  |  |  |
| R-NH <sub>2</sub> |   |  |  |  |

<sup>1</sup> Davis, P. W.; Osgood, S. A. *Bioorg. Med. Chem. Lett.* **1999**, 9, 2691.

The crude released materials were analyzed by RP-HPLC. In all cases, the HPLC profiles of the detached nucleotides showed a major peak,<sup>2</sup> typically accounting for more than 90% of the total integrated area. In a typical experiment, from 30 mg of resin **4**, 2-4 mg of the pure target compounds could be obtained. Yields of target compounds **5** - **12**, evaluated by quantitative UV analysis at 260 nm, were always in the range 70-80%, referred to the initial functionalization of the solid support.<sup>3</sup>

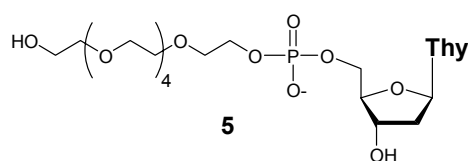

| ESI-MS (m/z)              |              |
|---------------------------|--------------|
| found                     | Calcd. for M |
| 585.50 [M-H] <sup>-</sup> | 586.21       |

Retention time: 11.5 min.

<sup>1</sup>H NMR (D<sub>2</sub>O, 400 MHz): 7.78 (1H, s, H-6 T), 6.39 (1H, dd, J = 7.2 and 7.2 Hz, H-1' T), 4.63 (1H, m, H-3' T), 4.21 (1H, m, H-4' T), 4.13 (2H, m, H<sub>2</sub>-5' T), 4.05 (2H, m, CH<sub>2</sub>OPO<sub>3</sub>), 3.87-3.67 (22H, overlapped signals, OCH<sub>2</sub> hexaethylene glycol residue), 2.42 (2H, m, H<sub>2</sub>-2' T), 1.97 (3H, s, CH<sub>3</sub> T).

NMR <sup>31</sup>P (D<sub>2</sub>O, 161.98 MHz): 3.3.

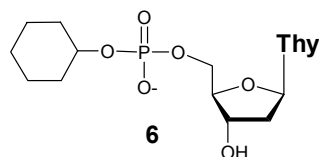

| ESI-MS (m/z)              |              |
|---------------------------|--------------|
| Found                     | Calcd. for M |
| 403.42 [M-H] <sup>-</sup> | 404.13       |

Retention time: 14.2 min.

<sup>1</sup>H NMR (D<sub>2</sub>O, 400 MHz): 7.79 (1H, s, H-6 T), 6.41 (1H, dd, J = 6.8 and 6.8 Hz, H-1' T), 4.66 (1H, m, H-3' T), 4.22 (1H, m, H-4' T), 4.11 (3H, overlapped signals, CH cyclohexanol and H<sub>2</sub>-5' T), 2.46 (2H, m, H<sub>2</sub>-2' T), 1.99 (3H, s, CH<sub>3</sub> T), 1.73 (4H, m, 2CH<sub>2</sub>-CH-O), 1.44-1.24 (6H, overlapped signals, other 3CH<sub>2</sub> protons in cyclohexanol residue).

<sup>31</sup>P NMR (D<sub>2</sub>O, 161.98 MHz): 2.7.

<sup>2</sup> As expected, in the case of entry **7**, two thymidine derivatives were obtained. They were easily identified as **7a** and **7b**, i.e. the 6- and 4-phosphodiester linked regioisomers of mannose.

<sup>3</sup> In all cases,  $\epsilon$  for the nucleotide adduct was assumed to be the same as the one reported in the literature for thymidine-monophosphate (8800 cm<sup>-1</sup>M<sup>-1</sup> at 25 °C in H<sub>2</sub>O), neglecting the contribution of the alcoholic or amino portion. In the specific case of aromatic amine adducts **11** and **12**, this led to underestimate the  $\epsilon$  value for the target compounds by no more than 2 %, which is well taken into account in the range of yields reported.

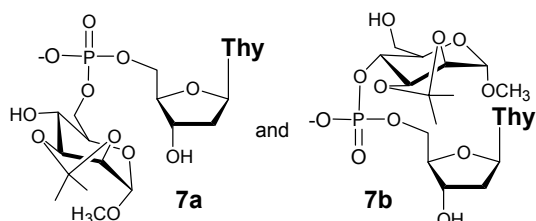

| ESI-MS (m/z)              |              |
|---------------------------|--------------|
| found                     | Calcd. for M |
| 537.39 [M-H] <sup>-</sup> | 538.16       |

Retention time: 12.3 and 12.8 min.

<sup>1</sup>H NMR (D<sub>2</sub>O, 400 MHz) **7a** and **7b** as a mixture: 7.84 and 7.82 (s's, H-6 T), 6.41 (dd, J = 6.8 and 6.8 Hz, H-1' T), 5.06 and 5.03 (s's, H-1 mannose), 4.65 (m, H-3' T), 4.31 – 3.74 (overlapped signals, H-4', H<sub>2</sub>-5' T and H-2, H-3, H-4, H-5 and H<sub>2</sub>-6 mannose), 3.49 and 3.46 (s's, 1-OCH<sub>3</sub> mannose), 2.43 (m, H<sub>2</sub>-2' T), 1.99 and 1.98 (s's, CH<sub>3</sub> T), 1.58, 1.55, 1.45 and 1.42 (s's, CH<sub>3</sub> acetonide).

<sup>31</sup>P NMR (D<sub>2</sub>O, 161.98 MHz): 3.5, 2.7.

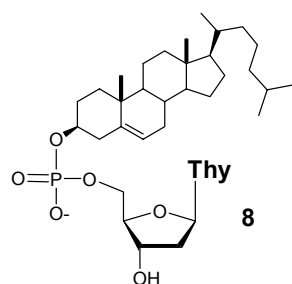

| ESI-MS (m/z)              |              |
|---------------------------|--------------|
| found                     | Calcd. For M |
| 689.78 [M-H] <sup>-</sup> | 690.40       |

Retention time: 24.8 min.

<sup>1</sup>H NMR (CD<sub>3</sub>OD, 400 MHz): 7.79 (1H, s, H-6 T), 6.35 (1H, dd, J = 6.4 and 6.4 Hz, H-1' T), 5.32 (1H, m, H-6 cholesterol residue), 4.50 (1H, m, H-3' T), 4.04-3.90 (3H, overlapped signals, H-4' and H<sub>2</sub>-5' T), 3.65 (1H, s, H-3 cholesterol residue), 2.30 (2H, m, H<sub>2</sub>-2' T), 2.20-0.65 (complex signals of cholesterol residue), 1.94 (3H, s, CH<sub>3</sub> T).

<sup>31</sup>P NMR (CD<sub>3</sub>OD, 161.98 MHz): 2.6.

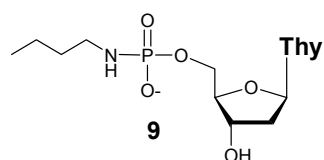

ESI-MS (m/z)

| found                     | Calcd. for M |
|---------------------------|--------------|
| 376.34 [M-H] <sup>-</sup> | 377.14       |

Retention time: 11.5 min.

<sup>1</sup>H NMR (CD<sub>3</sub>OD, 400 MHz): 7.89 (1H, s, H-6 T), 6.35 (1H, dd, J = 6.4 and 6.4 Hz, H-1' T), 4.52 (1H, m, H-3' T), 4.03 (1H, bs, H-4' T), 3.96 (2H, bs, H<sub>2</sub>-5' T), 2.86 (2H, m, CH<sub>2</sub>-NH), 2.33-2.18 (2H, m, H<sub>2</sub>-2' T), 1.95 (3H, s, CH<sub>3</sub> T), 1.46 (2H, m, CH<sub>3</sub>-CH<sub>2</sub>-CH<sub>2</sub>-CH<sub>2</sub>-NH), 1.32 (2H, m, CH<sub>3</sub>-CH<sub>2</sub>-CH<sub>2</sub>-CH<sub>2</sub>-NH), 0.89 (3H, t, J = 7.2 Hz, CH<sub>3</sub> butyl residue).

<sup>31</sup>P NMR (CD<sub>3</sub>OD, 161.98 MHz): 11.5.

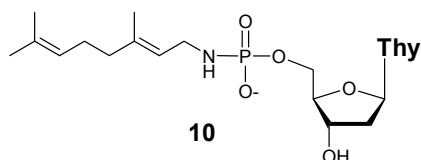

ESI-MS (m/z)

| found                     | Calcd. for M |
|---------------------------|--------------|
| 456.35 [M-H] <sup>-</sup> | 457.20       |

Retention time: 15.6 min.

<sup>1</sup>H NMR (CD<sub>3</sub>OD, 400 MHz): 7.89 (1H, d, J=1.2 Hz, H-6 T), 6.35 (1H, dd, J = 8.0 and 6.0 Hz, H-1' T), 5.29 (1H, t, J = 7.6 Hz, olefinic CH-CH<sub>2</sub>NH), 5.08 (1H, apparent t, J = 1.2 and 1.6 Hz, olefinic CH-CH<sub>2</sub>CH<sub>2</sub>), 4.51 (1H, m, Hz, H-3' T), 4.02 (1H, m, H-4' T), 3.97 (2H, apparent t, J = 4.4 and 2.8 Hz, H<sub>2</sub>-5' T), 3.48 (2H, t, J = 8.0 Hz, CH<sub>2</sub>-NH), 2.33-2.15 (2H, m, H<sub>2</sub>-2' T), 2.06 (2H, t, J = 7.6 Hz, CH<sub>2</sub>-CH<sub>2</sub>), 1.98-1.93 (5H, overlapped signals, CH<sub>3</sub> T and CH<sub>2</sub>-CH<sub>2</sub>), 1.65, 1.61, 1.58 (3H each, s' s, 3xCH<sub>3</sub>).

<sup>31</sup>P NMR (CD<sub>3</sub>OD, 161.98 MHz): 11.2.

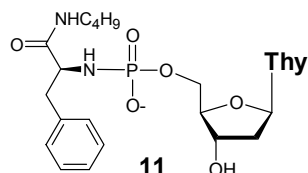

**ESI-MS (m/z)**

| found                     | Calcd. for M |
|---------------------------|--------------|
| 523.47 [M-H] <sup>-</sup> | 524.20       |

Retention time: 12.8 min.

**<sup>1</sup>H NMR** (CD<sub>3</sub>OD, 400 MHz): 7.85 (1H, s, H-6 T), 7.36-7.24 (5H, m, aromatic protons Phe), 6.33 (1H, dd, J = 6.0 and 6.0 Hz, H-1' T), 4.60 (1H, m, H-3' T), 4.05 (1H, m, CH α Phe), 3.95 (1H, m, H-4' T), 3.93 (2H, m, H<sub>2</sub>-5' T), 3.63 (2H, CH<sub>2</sub> Phe), 3.10 (2H, m, CH<sub>2</sub>-NH), 2.65 (2H, m, CH<sub>2</sub>-CH<sub>2</sub>NH), 2.30-2.15 (2H, m, H<sub>2</sub>-2' T), 1.91 (3H, s, CH<sub>3</sub> T), 1.60 (2H, m, CH<sub>2</sub>-CH<sub>3</sub>), 0.90 (3H, t, J = 7.2 Hz, CH<sub>3</sub>).

**<sup>31</sup>P NMR** (CD<sub>3</sub>OD, 161.98 MHz): 6.6.

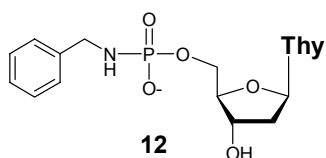

**ESI-MS (m/z)**

| found                     | Calcd. for M |
|---------------------------|--------------|
| 410.26 [M-H] <sup>-</sup> | 411.12       |

Retention time: 12.4 min.

**<sup>1</sup>H NMR** (CD<sub>3</sub>OD, 400 MHz): 7.84 (1H, s, H-6 T), 7.36-7.17 (5H, m, aromatic protons), 6.32 (1H, dd, J = 8.0 and 6.0 Hz, H-1' T), 4.65 (2H, AB system, CH<sub>2</sub>-Ph), 4.41 (1H, m, H-3' T), 3.98 (1H, m, H-4' T), 3.93 (2H, m, H<sub>2</sub>-5' T), 2.25-2.13 (2H, m, H<sub>2</sub>-2' T), 1.93 (3H, s, CH<sub>3</sub> T).

**<sup>31</sup>P NMR** (CD<sub>3</sub>OD, 161.98 MHz): 10.8.
